# Supplementary material for: GPR120 (FFAR4) is preferentially expressed in pancreatic delta cells and regulates somatostatin secretion from murine islets of Langerhans
Source: Springer Nature journal article supplement (doi:10.1007/s00125-014-3213-0), 2014-03-24
Supplement: MOESM1 [file 8092200]

Supplementary table (S1). Potencies of selective GPR120 agonists at either GPR120 (FFA4) or GPR40 (FFA1). Compounds were analysed using either fluorescent imaging plate reader (FLIPR) or label-free dynamic mass redistribution (DMR) technologies and the respective EC<sub>50</sub> values (μmol/l) calculated.

| <b>Compound</b> | <b>EC<sub>50</sub> at GPR120</b> |              | <b>EC<sub>50</sub> at GPR40</b> |
|-----------------|----------------------------------|--------------|---------------------------------|
|                 | <i>DMR</i>                       | <i>FLIPR</i> | <i>FLIPR</i>                    |
| Metabolex 36    | 0.99μmol/l                       | 1.17μmol/l   | >100μmol/l                      |
| AZ670           | 0.41μmol/l                       | 1.09μmol/l   | >30μmol/l                       |
| AZ423           | 0.51μmol/l                       | 1.60μmol/l   | >100μmol/l                      |
